# Supplementary material for: Rapid Whole-Exome Sequencing as a Diagnostic Tool in a Neonatal/Pediatric Intensive Care Unit
Source: PubMed Central journal article supplement (PMC7408678; doi:10.3390/jcm9072220), 2020-07-13
Supplement: jcm-09-02220-s001.pdf [file jcm-09-02220-s001.pdf]

# Supplementary Materials: Rapid Whole-Exome Sequencing as a Diagnostic Tool in a Neonatal/Pediatric Intensive Care Unit

Robert Śmigiel, Mateusz Biela, Krzysztof Szmyd, Michał Błoch, Elżbieta Szmida, Paweł Skiba, Anna Walczak, Piotr Gasperowicz, Joanna Kosińska, Małgorzata Rydzanicz, Piotr Stawiński, Anna Biernacka, Marzena Zielińska, Waldemar Gołębiowski, Agnieszka Jalowska, Grażyna Ohia, Bożena Głowska, Wojciech Walas, Barbara Królak-Olejniak, Paweł Krajewski, Jolanta Sykut-Cegielska, Maria M. Sasiadek and Rafał Płoski

Table S1. Variants pathogenicity criteria.

| ID/SE<br>X | Gene/OMIM<br>(Number, Disease,<br>Inheritance) | Variant (s)<br>hg38                                                                                                                         | Pathogenicity<br>Verdict According<br>to ACMG<br>Classification <sup>#</sup><br>( <a href="https://varsome.com">https://varsome.com</a> ) | Explanation                                                                                                                                                                                                                                                                                                                                                                       | Frequenc<br>y in<br>GnomAD |
|------------|------------------------------------------------|---------------------------------------------------------------------------------------------------------------------------------------------|-------------------------------------------------------------------------------------------------------------------------------------------|-----------------------------------------------------------------------------------------------------------------------------------------------------------------------------------------------------------------------------------------------------------------------------------------------------------------------------------------------------------------------------------|----------------------------|
| 1/M        | SCO2<br>604377<br>Leigh syndrome<br>AR         | compound heterozygote<br>NM_005138.3:<br>chr22:050524395-<br>C>CTGAGTCACTGCTGCATGCT<br>c.16_17insAGCATGCAGCAGTGACTCA;<br>p.(Arg6GlnfsTer82) | Pathogenic                                                                                                                                | PVS1: Null variant (frame-<br>shift) affecting gene SCO2,<br>which is a known<br>mechanism of disease<br>(gene has 19 known<br>pathogenic variants which<br>is greater than minimum of<br>3), associated with Myopia<br>6, Leigh syndrome,<br>Cardioencephalomyopathy<br>, fatal infantile, due to<br>cytochrome c oxidase<br>deficiency 1 and<br>Hypertrophic<br>cardiomyopathy. | 0.000576                   |

|                                                               |                   |                                                                                                                                                                                                                                                                                                                                                                                                                                                                                    |                  |
|---------------------------------------------------------------|-------------------|------------------------------------------------------------------------------------------------------------------------------------------------------------------------------------------------------------------------------------------------------------------------------------------------------------------------------------------------------------------------------------------------------------------------------------------------------------------------------------|------------------|
|                                                               |                   | <p>PM2: GnomAD exomes homozygous allele count = 0 is less than 3 threshold for recessive gene <i>SCO2</i> (unable to check gnomAD exomes coverage).<br/> GnomAD genomes homozygous allele count = 0 is less than 3 threshold for recessive gene <i>SCO2</i> (good gnomAD genomes coverage = 31.5).<br/> PP5: ClinVar classifies this variant as Likely Pathogenic, rated 1 star, criteria provided, single submitter, with 2 submissions, 1 publication (PubMed: 20159436).[1]</p> |                  |
| <p>chr22: 50523994-C&gt;T c.418G&gt;A;<br/> p.(Glu140Lys)</p> | <p>Pathogenic</p> | <p>PS3: ClinVar classifies this variant as Pathogenic, rated 2 stars backed by potential functional studies (requires user validation) mentioned in abstract of article (PubMed: 11673586) [2]<br/> PM1: UniProt protein <i>SCO2_HUMAN</i> domain 'Thioredoxin' has 12 non-VUS, non-synonymous, coding variants (8 pathogenic and 4 benign), pathogenicity = 66.7%</p>                                                                                                             | <p>0.0000796</p> |

---

which is more than threshold 33.3%.

PM2: GnomAD exomes homozygous allele count = 0 is less than 3 threshold for recessive gene *SCO2* (unable to check gnomAD exomes coverage).

GnomAD genomes homozygous allele count = 0 is less than 3 threshold for recessive gene *SCO2* (good gnomAD genomes coverage = 32.4).

PP2: 9 out of 15 non-VUS missense variants in gene *SCO2* are pathogenic = 60.0% which is more than threshold of 51.0%, and 19 out of 58 clinically reported variants in gene *SCO2* are pathogenic = 32.8% which is more than threshold of 12.0%.

PP3: Pathogenic computational verdict based on 9 pathogenic predictions from DEOGEN2, EIGEN, FATHMM-MKL, M-CAP, MVP, MutationAssessor, MutationTaster, REVEL and SIFT vs 1 benign prediction from PrimateAI.

---

|     |                                                   |                                                                                                 |                   |                                                                                                                                                                                                                                                                                                                                                                                                                                                                                                                                                                                                                                                                                                                      |           |
|-----|---------------------------------------------------|-------------------------------------------------------------------------------------------------|-------------------|----------------------------------------------------------------------------------------------------------------------------------------------------------------------------------------------------------------------------------------------------------------------------------------------------------------------------------------------------------------------------------------------------------------------------------------------------------------------------------------------------------------------------------------------------------------------------------------------------------------------------------------------------------------------------------------------------------------------|-----------|
| 2/M | <p>SCO2<br/>604377<br/>Leigh syndrome<br/>AR</p>  | <p>homozygote<br/>NM_005138.3:<br/>chr22: 50523994-C&gt;T<br/>c.418G&gt;A; p.(Glu140Lys)</p>    | Pathogenic        | As above                                                                                                                                                                                                                                                                                                                                                                                                                                                                                                                                                                                                                                                                                                             | 0.0000796 |
| 3/M | <p>POLG<br/>203700<br/>Alpers syndrome<br/>AR</p> | <p>homozygote<br/>NM_001126131.2:<br/>chr15:89320885-G&gt;C<br/>c.2862C&gt;G; p.(Ile954Met)</p> | Likely Pathogenic | <p>PM1: Hot-spot of length 61 base-pairs has 11 non-VUS coding variants (11 pathogenic and 0 benign), pathogenicity = 100.0%, qualifies as hot-spot<br/>PM2: Variant not found in gnomAD exomes (unable to check gnomAD exomes coverage).<br/>Variant not found in gnomAD genomes (good gnomAD genomes coverage = 32.6).<br/>PP2: 130 out of 190 non-VUS missense variants in gene <i>POLG</i> are pathogenic = 68.4% which is more than threshold of 51.0%, and 207 out of 970 clinically reported variants in gene <i>POLG</i> are pathogenic = 21.3% which is more than threshold of 12.0%.<br/>PP3: Pathogenic computational verdict based on 8 pathogenic predictions from DEOGEN2, FATHMM-MKL, M-CAP, MVP,</p> | 0         |

|     |                                                                                           |                                       |            |                                                                                                                                                                                                                                                                                                                                                                                                                                                                                                                                                                                                                                                                                                                      |          |
|-----|-------------------------------------------------------------------------------------------|---------------------------------------|------------|----------------------------------------------------------------------------------------------------------------------------------------------------------------------------------------------------------------------------------------------------------------------------------------------------------------------------------------------------------------------------------------------------------------------------------------------------------------------------------------------------------------------------------------------------------------------------------------------------------------------------------------------------------------------------------------------------------------------|----------|
|     |                                                                                           |                                       |            | MutationAssessor,<br>MutationTaster, REVEL<br>and SIFT vs 1 benign<br>prediction from EIGEN.                                                                                                                                                                                                                                                                                                                                                                                                                                                                                                                                                                                                                         |          |
| 4/F | <i>GBE1</i><br>232500                                                                     | compound heterozygote<br>NM_005158.3: |            |                                                                                                                                                                                                                                                                                                                                                                                                                                                                                                                                                                                                                                                                                                                      |          |
|     | Glycogen storage<br>disease IV - perinatal<br>severe form<br>(Anderson<br>syndrome)<br>AR | Chr3:81648854-A>G c.691+2T>C; p.?     | Pathogenic | PVS1: Null variant<br>(intronic within ±2 of splice<br>site) affecting gene <i>GBE1</i> ,<br>which is a known<br>mechanism of disease<br>(gene has 38 known<br>pathogenic variants which<br>is greater than minimum of<br>3), associated with<br>Glycogen storage disease<br>IV.<br>PP5: ClinVar classifies this<br>variant as Pathogenic, rated<br>2 stars, with 11<br>submissions, 10<br>publications and no<br>conflicts. [3-5]<br>PM2: GnomAD exomes<br>homozygous allele count =<br>0 is less than 3 threshold<br>for recessive gene <i>GBE1</i><br>(unable to check gnomAD<br>exomes coverage).<br>GnomAD genomes<br>homozygous allele count =<br>0 is less than 3 threshold<br>for recessive gene <i>GBE1</i> | 0.000895 |

|                                               |                           |                                                                                                                                                                                                                                                                                                                                                                                                                                                                                                                                                                             |   |
|-----------------------------------------------|---------------------------|-----------------------------------------------------------------------------------------------------------------------------------------------------------------------------------------------------------------------------------------------------------------------------------------------------------------------------------------------------------------------------------------------------------------------------------------------------------------------------------------------------------------------------------------------------------------------------|---|
|                                               |                           | (good gnomAD genomes coverage = 31.0).<br>PP3: Pathogenic computational verdict based on 3 pathogenic predictions from EIGEN, FATHMM-MKL and MutationTaster vs no benign predictions.                                                                                                                                                                                                                                                                                                                                                                                       |   |
| Chr3:81499187-C>T<br>c.1975G>A; p.(Gly659Arg) | Uncertain<br>Significance | PM2: Variant not found in gnomAD exomes (unable to check gnomAD exomes coverage).<br>Variant not found in gnomAD genomes (good gnomAD genomes coverage = 31.4).<br>PP2: 17 out of 29 non-VUS missense variants in gene <i>GBE1</i> are pathogenic = 58.6% which is more than threshold of 51.0%, and 38 out of 149 clinically reported variants in gene <i>GBE1</i> are pathogenic = 25.5% which is more than threshold of 12.0%.<br>PP3: Pathogenic computational verdict based on 9 pathogenic predictions from DEOGEN2, EIGEN, FATHMM-MKL, M-CAP, MVP, MutationAssessor, | 0 |

|     |                                                          |                                                                                         | MutationTaster, REVEL and SIFT vs 1 benign prediction from PrimateAI. |                                                                                                                                                                                                                                                                                                                                                                                                                                                                                                                                               |                                                                  |
|-----|----------------------------------------------------------|-----------------------------------------------------------------------------------------|-----------------------------------------------------------------------|-----------------------------------------------------------------------------------------------------------------------------------------------------------------------------------------------------------------------------------------------------------------------------------------------------------------------------------------------------------------------------------------------------------------------------------------------------------------------------------------------------------------------------------------------|------------------------------------------------------------------|
| 5/F | PC<br>216150<br>Pyruvate carboxylase<br>deficiency<br>AR | compound heterozygote<br>NM_022172.3:<br>Chr11:66866282-G>A<br>c.1090C>T; p.(Gln364Ter) | Pathogenic                                                            | PVS1: Null variant (nonsense) affecting gene <i>PC</i> , which is a known mechanism of disease (gene has 38 known pathogenic variants which is greater than minimum of 3), associated with Pyruvate carboxylase deficiency.<br>PM2: Variant not found in gnomAD exomes (unable to check gnomAD exomes coverage).<br>Variant not found in gnomAD genomes (good gnomAD genomes coverage = 31.2).<br>PP3: Pathogenic computational verdict based on 3 pathogenic predictions from EIGEN, FATHMM-MKL and MutationTaster vs no benign predictions. | This variant does not have a gnomAD genomes entry (czy pisać ??) |
|     |                                                          | Chr11:66863920-C>G<br>c.1222G>C; p.(Asp408His)                                          | Pathogenic                                                            | PM1: UniProt protein PYC_HUMAN domain 'Biotin carboxylation' has 16 non-VUS, non-                                                                                                                                                                                                                                                                                                                                                                                                                                                             | This variant does not have a                                     |

---

|                                                                                                                                                                                                                                                                                                                                                                                                                                                                                                                                                                                                                                                                                                                                                                                                                    |                            |
|--------------------------------------------------------------------------------------------------------------------------------------------------------------------------------------------------------------------------------------------------------------------------------------------------------------------------------------------------------------------------------------------------------------------------------------------------------------------------------------------------------------------------------------------------------------------------------------------------------------------------------------------------------------------------------------------------------------------------------------------------------------------------------------------------------------------|----------------------------|
| synonymous, coding variants (13 pathogenic and 3 benign), pathogenicity = 81.2% which is more than threshold 33.3%.<br>PM2: Variant not found in gnomAD exomes (unable to check gnomAD exomes coverage).<br>Variant not found in gnomAD genomes (good gnomAD genomes coverage = 32.3).<br>PP2: 24 out of 35 non-VUS missense variants in gene <i>PC</i> are pathogenic = 68.6% which is more than threshold of 51.0%, and 38 out of 242 clinically reported variants in gene <i>PC</i> are pathogenic = 15.7% which is more than threshold of 12.0%.<br>PP3: 24 out of 35 non-VUS missense variants in gene <i>PC</i> are pathogenic = 68.6% which is more than threshold of 51.0%, and 38 out of 242 clinically reported variants in gene <i>PC</i> are pathogenic = 15.7% which is more than threshold of 12.0%. | gnomAD<br>genomes<br>entry |
|--------------------------------------------------------------------------------------------------------------------------------------------------------------------------------------------------------------------------------------------------------------------------------------------------------------------------------------------------------------------------------------------------------------------------------------------------------------------------------------------------------------------------------------------------------------------------------------------------------------------------------------------------------------------------------------------------------------------------------------------------------------------------------------------------------------------|----------------------------|

---



|     |                                                                                        |                                                                              |            |                                                                                                                                                                                                                                                                                                                                                                                                                                                                                                                                                                                                                                                                                                                                                                                                                                                                                     |   |
|-----|----------------------------------------------------------------------------------------|------------------------------------------------------------------------------|------------|-------------------------------------------------------------------------------------------------------------------------------------------------------------------------------------------------------------------------------------------------------------------------------------------------------------------------------------------------------------------------------------------------------------------------------------------------------------------------------------------------------------------------------------------------------------------------------------------------------------------------------------------------------------------------------------------------------------------------------------------------------------------------------------------------------------------------------------------------------------------------------------|---|
| 6/M | <i>AIFM1</i><br>300816<br>Combined oxidative<br>phosphorylation<br>deficiency 6<br>XLR | hemizygote<br>NM_004208.3:<br>chrX:130133411-C>G<br>c.1350G>C; p.(Arg450Ser) | Pathogenic | PM1: UniProt protein<br>AIFM1_HUMAN region of<br>interest 'FAD-dependent<br>oxidoreductase' has 34 non-<br>VUS, non-synonymous,<br>coding variants (31<br>pathogenic and 3 benign),<br>pathogenicity = 91.2%<br>which is more than<br>threshold 33.3%.<br>PM2: Variant not found in<br>gnomAD exomes (unable<br>to check gnomAD exomes<br>coverage).<br>Variant not found in<br>gnomAD genomes (good<br>gnomAD genomes<br>coverage = 23.2).<br>PP2: 40 out of 50 non-VUS<br>missense variants in gene<br><i>AIFM1</i> are pathogenic =<br>80.0% which is more than<br>threshold of 51.0%, and 42<br>out of 134 clinically<br>reported variants in gene<br><i>AIFM1</i> are pathogenic =<br>31.3% which is more than<br>threshold of 12.0%.<br>PP3: Pathogenic<br>computational verdict<br>based on 6 pathogenic<br>predictions from<br>FATHMM-MKL, M-CAP,<br>MVP, MutationAssessor, | 0 |
|-----|----------------------------------------------------------------------------------------|------------------------------------------------------------------------------|------------|-------------------------------------------------------------------------------------------------------------------------------------------------------------------------------------------------------------------------------------------------------------------------------------------------------------------------------------------------------------------------------------------------------------------------------------------------------------------------------------------------------------------------------------------------------------------------------------------------------------------------------------------------------------------------------------------------------------------------------------------------------------------------------------------------------------------------------------------------------------------------------------|---|

|     |                                                                                                   |                                                                                                  |                        | MutationTaster and SIFT vs 2 benign predictions from DEOGEN2 and REVEL.                                                                                                                                                                                                                                                                                                                                                                                                                                                  |           |
|-----|---------------------------------------------------------------------------------------------------|--------------------------------------------------------------------------------------------------|------------------------|--------------------------------------------------------------------------------------------------------------------------------------------------------------------------------------------------------------------------------------------------------------------------------------------------------------------------------------------------------------------------------------------------------------------------------------------------------------------------------------------------------------------------|-----------|
| 7/F | <p><i>ABCA3</i><br/>610921<br/>Surfactant metabolism dysfunction, pulmonary, 3 (SMPD3)<br/>AR</p> | <p>homozygote<br/>NM_001089.3:<br/>Chr16:002323532-C&gt;T<br/>c.604G&gt;A; p.(Gly202Arg)</p>     | Uncertain Significance | <p>PM2: GnomAD exomes homozygous allele count = 0 is less than 3 threshold for recessive gene <i>ABCA3</i> (unable to check gnomAD exomes coverage).<br/>GnomAD genomes homozygous allele count = 0 is less than 3 threshold for recessive gene <i>ABCA3</i> (good gnomAD genomes coverage = 31.2).<br/>PP3: Pathogenic computational verdict based on 9 pathogenic predictions from DEOGEN2, EIGEN, FATHMM-MKL, M-CAP, MVP, MutationAssessor, MutationTaster, REVEL and SIFT vs 1 benign prediction from PrimateAI.</p> | 0.0000159 |
| 8/F | <p><i>MAGEL2</i><br/>615547<br/>Schaaf-Yang syndrome<br/>AD</p>                                   | <p><i>de novo</i><br/>NM_019066.4:<br/>Chr15:23644849-C&gt;T<br/>c.2894G&gt;A; p.(Trp965Ter)</p> | Pathogenic             | <p>PVS1: Null variant (nonsense) affecting gene <i>MAGEL2</i>, which is a known mechanism of disease (gene has 73 known pathogenic variants which is greater than minimum of 3), associated with Schaaf-</p>                                                                                                                                                                                                                                                                                                             | 0         |

|     |                                                                                               |                                                 |            |                                                                                                                                                                                                                                                                                                                                                                     |            |
|-----|-----------------------------------------------------------------------------------------------|-------------------------------------------------|------------|---------------------------------------------------------------------------------------------------------------------------------------------------------------------------------------------------------------------------------------------------------------------------------------------------------------------------------------------------------------------|------------|
|     |                                                                                               |                                                 |            | Yang syndrome (Prader-Willi-like syndrome).<br>PM2: Variant not found in gnomAD exomes (unable to check gnomAD exomes coverage).<br>Variant not found in gnomAD genomes (good gnomAD genomes coverage = 31.6).<br>PP3: Pathogenic computational verdict based on 3 pathogenic predictions from EIGEN, FATHMM-MKL and MutationTaster vs no benign predictions.       |            |
| 9/F | <i>NALCN</i><br>611549                                                                        | compound heterozygote<br>NM_052867.2:           |            |                                                                                                                                                                                                                                                                                                                                                                     |            |
|     | Hypotonia, infantile, with psychomotor retardation and characteristic facies 1 (IHPRF1)<br>AR | chr13:101111216-G>A<br>c.2203C>T; p.(Arg735Ter) | Pathogenic | PVS1: Null variant (nonsense) affecting gene <i>NALCN</i> , which is a known mechanism of disease (gene has 77 known pathogenic variants which is greater than minimum of 3), associated with Congenital contractures of the limbs and face, hypotonia, and developmental delay and Hypotonia, infantile, with psychomotor retardation and characteristic facies 1. | 0.00000807 |

|                                        |                                                                                                                                                          |                                                                                                                                                                                                                                                                                                                                                                                                                                                                                                                                                                                          |    |
|----------------------------------------|----------------------------------------------------------------------------------------------------------------------------------------------------------|------------------------------------------------------------------------------------------------------------------------------------------------------------------------------------------------------------------------------------------------------------------------------------------------------------------------------------------------------------------------------------------------------------------------------------------------------------------------------------------------------------------------------------------------------------------------------------------|----|
|                                        |                                                                                                                                                          | <p>PM2: GnomAD exomes homozygous allele count = 0 is less than 3 threshold for recessive gene <i>NALCN</i> (unable to check gnomAD exomes coverage).<br/> GnomAD genomes homozygous allele count = 0 is less than 3 threshold for recessive gene <i>NALCN</i> (good gnomAD genomes coverage = 31.4).<br/> PP3: Pathogenic computational verdict based on 3 pathogenic predictions from EIGEN, FATHMM-MKL and MutationTaster vs no benign predictions.<br/> PP5: ClinVar classifies this variant as Pathogenic, rated 1 star, criteria provided, single submitter, with 1 submission.</p> |    |
| Chr13:101229388-C>A<br>c.1626+5G>T; p- | Uncertain Significance<br>(note: Predicted to strongly affect splicing -ADA<br>Score 0.9997. If this is taken into account the verdict is „pathogenic“). | <p>PM2: Variant not found in gnomAD exomes (unable to check gnomAD exomes coverage).<br/> Variant not found in gnomAD genomes (good gnomAD genomes coverage = 32.0).</p>                                                                                                                                                                                                                                                                                                                                                                                                                 | 0? |

|      |                                            |                                                                                 |                   |                                                                                                                                                                                                                                                                                                                                                                                                                                                                                                                                                                                                                                                                                                                                                                                      |   |
|------|--------------------------------------------|---------------------------------------------------------------------------------|-------------------|--------------------------------------------------------------------------------------------------------------------------------------------------------------------------------------------------------------------------------------------------------------------------------------------------------------------------------------------------------------------------------------------------------------------------------------------------------------------------------------------------------------------------------------------------------------------------------------------------------------------------------------------------------------------------------------------------------------------------------------------------------------------------------------|---|
| 10/F | ACTA1<br>161800<br>Nemaline myopathy<br>AD | <i>de novo</i><br>NM_001100.3:<br>Chr1:229432567-C>A<br>c.443G>T, p.(Gly148Val) | Likely Pathogenic | PM1: Hot-spot of length 61 base-pairs has 13 non-VUS coding variants (13 pathogenic and 0 benign), pathogenicity = 100.0%, qualifies as hot-spot.<br>PM2: Variant not found in gnomAD exomes (unable to check gnomAD exomes coverage).<br>Variant not found in gnomAD genomes (good gnomAD genomes coverage = 30.5).<br>PM5: Alternative variant chr1:229432567 C⇒T (Gly148Asp) is classified Pathogenic by UniProt Variants (and confirmed using ACMG).<br>Alternative variant chr1:229432568 C⇒ G (Gly148Arg) is classified Pathogenic, 1 star, by ClinVar (and confirmed using ACMG).<br>Alternative variant chr1:229432568 C⇒ T (Gly148Ser) is classified Likely Pathogenic, 2 stars, by ClinVar (and confirmed using ACMG).<br>PP2: 168 out of 168 non-VUS missense variants in | 0 |
|------|--------------------------------------------|---------------------------------------------------------------------------------|-------------------|--------------------------------------------------------------------------------------------------------------------------------------------------------------------------------------------------------------------------------------------------------------------------------------------------------------------------------------------------------------------------------------------------------------------------------------------------------------------------------------------------------------------------------------------------------------------------------------------------------------------------------------------------------------------------------------------------------------------------------------------------------------------------------------|---|

|      |                                                                                                     |                                                                                        |                           |                                                                                                                                                                                                                                                                                                                                                                                                              |            |
|------|-----------------------------------------------------------------------------------------------------|----------------------------------------------------------------------------------------|---------------------------|--------------------------------------------------------------------------------------------------------------------------------------------------------------------------------------------------------------------------------------------------------------------------------------------------------------------------------------------------------------------------------------------------------------|------------|
|      |                                                                                                     |                                                                                        |                           | gene ACTA1 are pathogenic = 100.0% which is more than threshold of 51.0%, and 186 out of 284 clinically reported variants in gene ACTA1 are pathogenic = 65.5% which is more than threshold of 12.0%<br>PP3: Pathogenic computational verdict based on 9 pathogenic predictions from DEOGEN2, EIGEN, FATHMM-MKL, M-CAP, MVP, MutationAssessor, MutationTaster, PrimateAI and REVEL vs no benign predictions. |            |
| 12/M | TRMT10C<br>616974<br>Mitochondrial disease (Combined oxidative phosphorylation deficiency 30)<br>AR | compound heterozygote<br>NM_017819.4:<br>Chr3:101565509-T>C<br>c.728T>C; p.(Ile243Thr) | Uncertain<br>Significance | PM1: UniProt protein TM10C_HUMAN domain 'SAM-dependent MTase TRM10-type' has 1 non-VUS, non-synonymous, coding variant (1 pathogenic and 0 benign), pathogenicity = 100.0% which is more than threshold 33.3%.<br>PM2: GnomAD exomes homozygous allele count = 0 is less than 3 threshold                                                                                                                    | 0.00000401 |

|      |                                                                                                     |                                                                              |                   |                                                                                                                                                                                                                                                                                                                                                                                                  |                                                                                               |
|------|-----------------------------------------------------------------------------------------------------|------------------------------------------------------------------------------|-------------------|--------------------------------------------------------------------------------------------------------------------------------------------------------------------------------------------------------------------------------------------------------------------------------------------------------------------------------------------------------------------------------------------------|-----------------------------------------------------------------------------------------------|
|      |                                                                                                     |                                                                              |                   | for recessive gene<br>TRMT10C (unable to check<br>gnomAD exomes<br>coverage).<br>Variant not found in<br>gnomAD genomes (good<br>gnomAD genomes<br>coverage = 31.3).<br>PP3: Pathogenic<br>computational verdict<br>based on 5 pathogenic<br>predictions from EIGEN,<br>FATHMM-MKL,<br>MutationTaster, PrimateAI<br>and SIFT vs 4 benign<br>predictions from<br>DEOGEN2, M-CAP, MVP<br>and REVEL |                                                                                               |
|      |                                                                                                     | Chr3:101565164-C>CA<br>c.393_3394insA; p.(Tyr132IlefsTer15)                  | Likely Pathogenic | PVS1: Frameshift variant<br>PM2: GnomAD genomes<br>homozygous allele count =<br>0 is less than 3 threshold<br>for recessive gene<br>TRMT10C Note: GnomAD<br>have indicated that the<br>data quality is suspect.                                                                                                                                                                                  | 0.00177<br>Note:<br>GnomAD<br>have<br>indicated<br>that the<br>data<br>quality is<br>suspect. |
| 13/F | NFASC<br>618356<br>New disorder<br>described<br>(Neurodevelopmental<br>disorder with<br>central and | homozygote<br>NM_015090.3:<br>Chr1:204984059-C>T<br>c.2491C>T; p.(Arg831Ter) | Pathogenic        | PVS1: Null variant<br>(nonsense) affecting gene<br>NFASC, which is a known<br>mechanism of disease<br>(gene has 5 known<br>pathogenic variants which<br>is greater than minimum of                                                                                                                                                                                                               | 0.00000795                                                                                    |

---

peripheral motor  
dysfunction)  
AR

3), associated with  
Neurodevelopmental  
disorder with central and  
peripheral motor  
dysfunction.  
PM2: GnomAD exomes  
homozygous allele count =  
0 is less than 3 threshold  
for recessive gene *NFASC*  
(unable to check gnomAD  
exomes coverage).  
GnomAD genomes  
homozygous allele count =  
0 is less than 3 threshold  
for recessive gene *NFASC*  
(good gnomAD genomes  
coverage = 31.0).  
PP5: ClinVar classifies this  
variant as Pathogenic, rated  
0 stars, no assertion criteria  
provided, with 1  
submission, 1 publication  
(PubMed: 30124836) [6].  
Using strength Moderate  
because VarSome users  
have linked 1 article:  
30124836, stating this  
variant is pathogenic.  
PP3: Pathogenic  
computational verdict  
based on 2 pathogenic  
predictions from  
FATHMM-MKL and

---



|      |                                                      |                                                                                |                        |                                                                                                                                                                                                                                                                                                                                                                                 |   |
|------|------------------------------------------------------|--------------------------------------------------------------------------------|------------------------|---------------------------------------------------------------------------------------------------------------------------------------------------------------------------------------------------------------------------------------------------------------------------------------------------------------------------------------------------------------------------------|---|
|      |                                                      |                                                                                |                        | MutationTaster vs 1 benign prediction from EIGEN.                                                                                                                                                                                                                                                                                                                               |   |
| 14/M | <i>NARS1</i><br>108410<br>A new disease suspected AR | homozygote<br>NM_004539.4:<br>Chr18:57606713-A>G<br>c.1040T>C; p.(Phe347Ser)   | Uncertain Significance | PM2: Variant not found in gnomAD exomes (unable to check gnomAD exomes coverage).<br>Variant not found in gnomAD genomes (good gnomAD genomes coverage = 30.5).<br>PP3: Pathogenic computational verdict based on 9 pathogenic predictions from DEOGEN2, EIGEN, FATHMM-MKL, M-CAP, MVP, MutationAssessor, MutationTaster, REVEL and SIFT vs 1 benign prediction from PrimateAI. | 0 |
| 15/M | <i>DCAF5</i><br>603812<br>A new disease suspected AD | <i>de novo</i><br>NM_003861.3:<br>14:069055385-G>C<br>c.1301C>G; p.(Ser434Ter) | Pathogenic             | PVS1: Null variant (nonsense) affecting gene DCAF5, which is a known mechanism of disease (the ExAC probability LOF intolerant (pLI) = 1 is greater than 0.7 threshold and probability LOF tolerant (pNull) = 0 is less than 0.3 threshold).<br>PM2: Variant not found in gnomAD exomes (unable to check gnomAD exomes coverage).                                               | 0 |

|      |                                        |                                                                              |            |                                                                                                                                                                                                                        |           |
|------|----------------------------------------|------------------------------------------------------------------------------|------------|------------------------------------------------------------------------------------------------------------------------------------------------------------------------------------------------------------------------|-----------|
|      |                                        |                                                                              |            | Variant not found in gnomAD genomes (good gnomAD genomes coverage = 31.3). PP3: Pathogenic computational verdict based on 3 pathogenic predictions from EIGEN, FATHMM-MKL and MutationTaster vs no benign predictions. |           |
| 18/M | SCO2<br>604377<br>Leigh syndrome<br>AR | homozygote<br>NM_005138.3:<br>chr22: 50523994-C>T<br>c.418G>A; p.(Glu140Lys) | Pathogenic | AS IN PATIENT 1 AND 2                                                                                                                                                                                                  | 0.0000796 |

F – female, M – male

## References

1. Joost, K.; Rodenburg, R.; Piirsoo, A.; van den Heuvel, B.; Zordania, R.; Ounap, K. A novel mutation in the SCO2 gene in a neonate with early-onset cardioencephalomyopathy. *Pediatr. Neurol.* **2010**, *42*, 227–230, doi:10.1016/j.pediatrneurol.2009.10.004.
2. Jaksch, M.; Horvath, R.; Horn, N.; Auer, D.P.; Macmillan, C.; Peters, J.; Gerbitz, K.D.; Kraegeloh-Mann, I.; Muntau, A.; Karcagi, V.; et al. Homozygosity (E140K) in SCO2 causes delayed infantile onset of cardiomyopathy and neuropathy. *Neurology* **2001**, *57*, 1440–1446, doi:10.1212/wnl.57.8.1440.
3. Ravenscroft, G.; Thompson, E.M.; Todd, E.J.; Yau, K.S.; Kresoje, N.; Sivadorai, P.; Friend, K.; Riley, K.; Manton, N.D.; Blumbergs, P.; et al. Whole exome sequencing in foetal akinesia expands the genotype-phenotype spectrum of GBE1 glycogen storage disease mutations. *Neuromuscul. Disord.* **2013**, *23*, 165–169, doi:10.1016/j.nmd.2012.11.005.
4. Bendroth-Asmussen, L.; Aksglaede, L.; Gernow, A.B.; Lund, A.M. Glycogen Storage Disease Type IV: A Case With Histopathologic Findings in First-Trimester Placental Tissue. *Int. J. Gynecol. Pathol.* **2016**, *35*, 38–40, doi:10.1097/PGP.0000000000000214.
5. Dainese, L.; Adam, N.; Boudjemaa, S.; Hadid, K.; Rosenblatt, J.; Jouannic, J.-M.; Heron, D.; Froissart, R.; Coulomb, A. Glycogen Storage Disease Type IV and Early Implantation Defect: Early Trophoblastic Involvement Associated with a New GBE1 Mutation. *Pediatr. Dev. Pathol.* **2016**, *19*, 512–515, doi:10.2350/14-09-1557-CR.1.

6. Smigiel, R.; Sherman, D.L.; Rydzanicz, M.; Walczak, A.; Mikolajkow, D.; Krolak-Olejnik, B.; Kosinska, J.; Gasperowicz, P.; Biernacka, A.; Stawinski, P.; et al. Homozygous mutation in the Neurofascin gene affecting the glial isoform of Neurofascin causes severe neurodevelopment disorder with hypotonia, amimia and areflexia. *Hum. Mol. Genet.* **2018**, *27*, 3669–3674, doi:10.1093/hmg/ddy277.

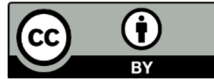

© 2020 by the authors. Licensee MDPI, Basel, Switzerland. This article is an open access article distributed under the terms and conditions of the Creative Commons Attribution (CC BY) license (<http://creativecommons.org/licenses/by/4.0/>).
